# Supplementary material for: Synthesis, physical properties and application of the zero-valent iron/titanium dioxide heterocomposite having high activity for the sustainable photocatalytic removal of hexavalent chromium in water
Source: Royal Society of Chemistry journal article supplement (doi:10.1039/c6cp01013j), 2016-01-01
Supplement: c6cp01013j1.pdf [file c6cp01013j1.pdf]

Supporting information

to

**Synthesis, physical properties and application of zero-valent iron/titanium dioxide heterocomposite encoding high activity for the sustainable photocatalytic removal of hexavalent chromium in water**

Eleni Petala,<sup>a,b</sup> Maria Baikousi,<sup>b</sup> Michael A. Karakassides,<sup>b,\*</sup> Giorgio Zoppellaro,<sup>a</sup> Jan Filip,<sup>a</sup> Jiří Tuček,<sup>a</sup> Konstantinos C. Vasilopoulos,<sup>b,c</sup> Jiří Pechoušek,<sup>a</sup> and Radek Zbořil<sup>a,\*</sup>

*<sup>a</sup> Regional Centre of Advanced Technologies and Materials, Departments of Physical Chemistry and Experimental Physics, Faculty of Science, Palacký University, 17. listopadu 1192/12, CZ-771 46 Olomouc, Czech Republic*

*<sup>b</sup> Department of Materials Science and Engineering, University of Ioannina, GR-45110 Ioannina, Greece*

*<sup>c</sup> Institute of Electronic Structure and Laser, Foundation for Research and Technology-Hellas, Heraklion, Greece*

\* Corresponding authors: Phone: +420 585634337, Fax: +420585634761, E-mail address: radek.zboril@upol.cz (Radek Zboril); Phone: +2651097276, Fax: +2651097074, E-mail address: mkarakas@uoi.gr (Michael A. Karakassides)

Number of pages: 8

Number of figures: 4

Number of tables: 2

## Supporting text

### Batch experiments for hexavalent chromium removal

The Cr(VI) concentrations in the solutions were determined colorimetrically by using the 1,5-diphenylcarbazide method, which is based on the reaction of Cr(VI) cations with 1,5-diphenylcarbazide molecules leading to the formation of a red–purple chromium 1,5-diphenylcarbazide complex. 0.3 mL of the Cr(VI) solution was mixed with 2.7 mL of distilled water, 120  $\mu\text{L}$  of 1,5-diphenylcarbazide (0.025 g) solution in acetone (10 mL) and 60  $\mu\text{L}$  of  $\text{H}_3\text{PO}_4$  solution (0.5 mL of  $\text{H}_3\text{PO}_4$  (85%) in 10 mL of  $\text{H}_2\text{O}$ ). The solution was left for 10 min to allow color development, and then the solution concentration was determined spectrophotometrically at 540 nm. Furthermore, the ability of repetitive use of nZVI@TiO<sub>2</sub> nanocomposite has been tested by applying different cycles of reaction with hexavalent chromium. The regeneration of the solid was performed after each three cycles by means of washing and storage for 1 hour in absolute ethanol. Absorption spectra of solutions were measured using a 10 mm optical path quartz cuvette. UV-Vis spectra were recorded on a Shimadzu UV-2401PC two beam spectrophotometer in the range of 350–700 nm, at a step of 0.5 nm, using combination of deuterium and halogen lamps as sources.

## Supporting figures

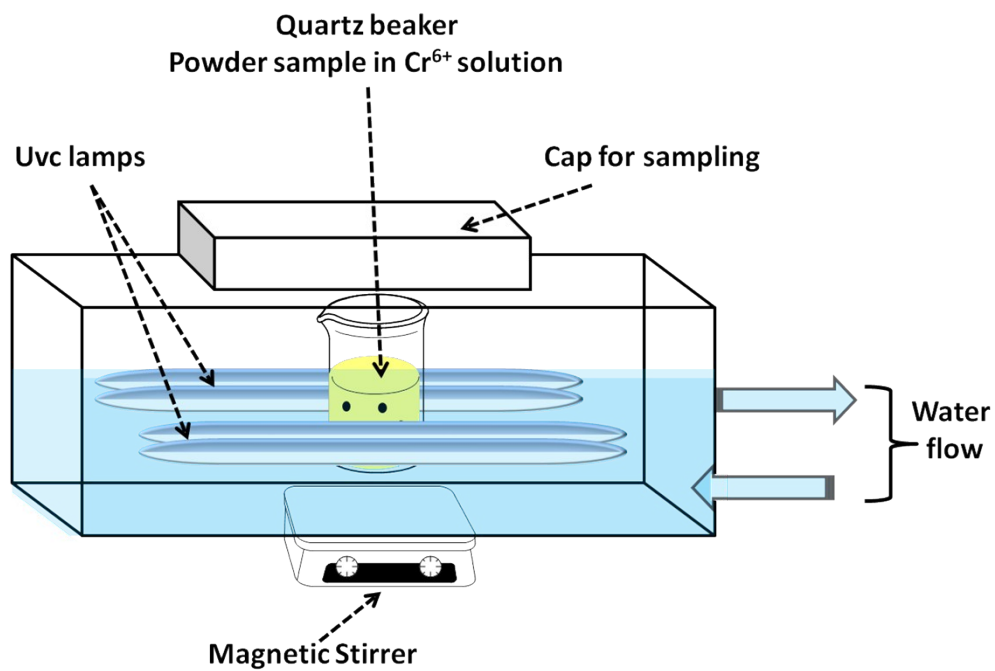

Fig. S1. Schematic illustration of the photoreactor that was used.

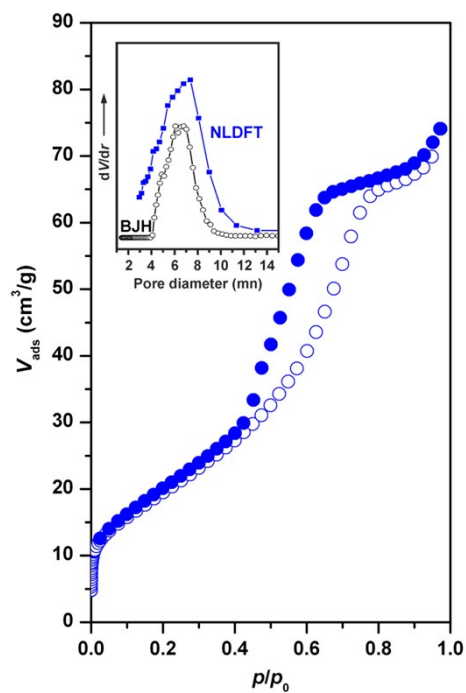

Fig. S2. N<sub>2</sub> adsorption-desorption isotherms of mesoporous pristine TiO<sub>2</sub>. Inset: BJH and NLDFT pore size distributions.

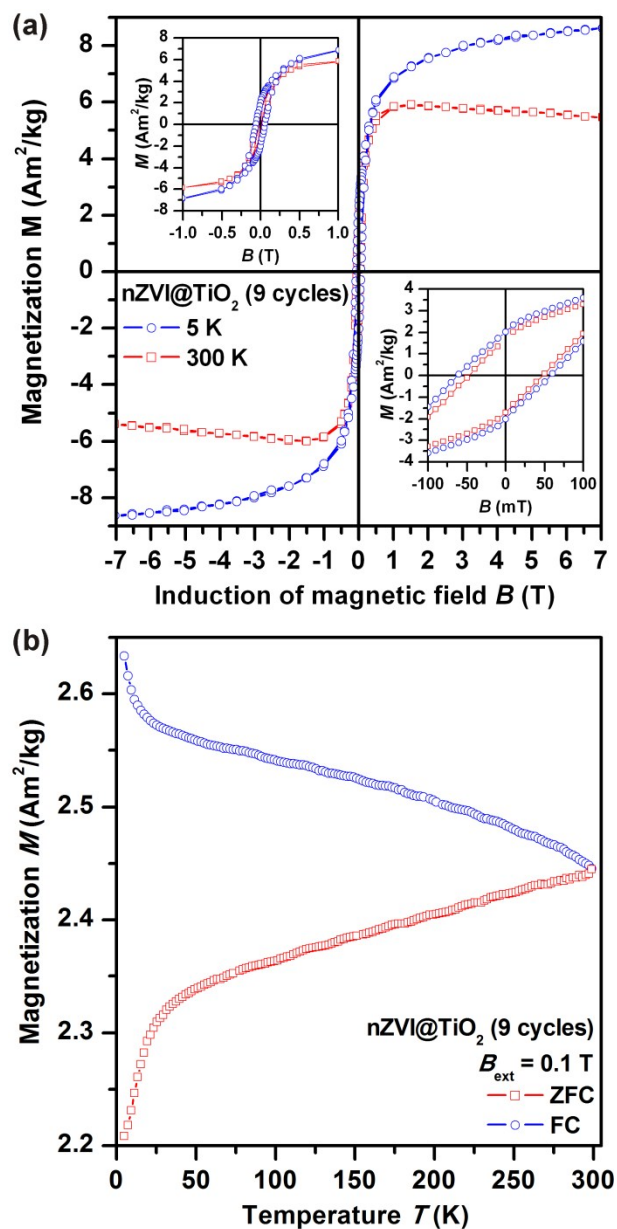

**Fig. S3.** (a) Magnetic hysteresis loops of the nZVI@TiO<sub>2</sub> photocatalyst after nine (9) reaction cycles with Cr(VI) solutions at 5 and 300 K and (b) ZFC and FC magnetization curves recorded under an applied magnetic field of 0.1 T.

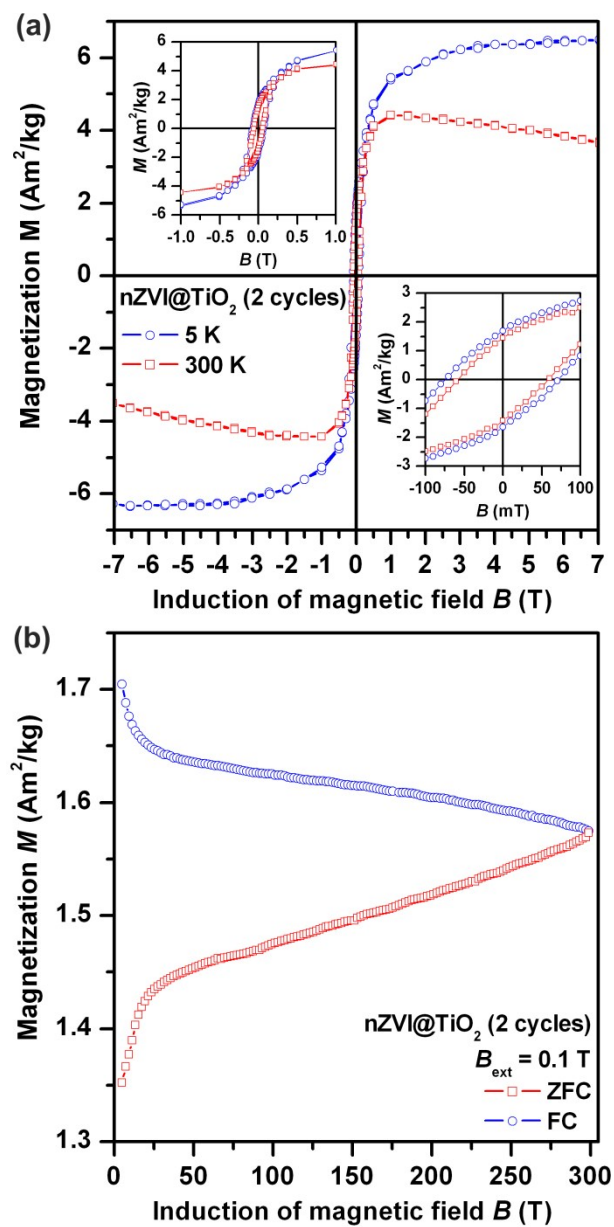

**Fig. S4.** (a) Magnetic hysteresis loops of the nZVI@TiO<sub>2</sub> photocatalyst after two (2) reaction cycles with Cr(VI) solutions at 5 and 300 K and (b) ZFC and FC magnetization curves recorded under an applied magnetic field of 0.1 T.

## Supporting tables

**Table S1.** Values of hysteresis parameters of the nZVI@TiO<sub>2</sub> samples, derived from the hysteresis loops measured at a temperature of 5 and 300 K, where  $M_{\max+}$  (7 T) is a maximum magnetization in 7 T,  $M_{\max-}$  (-7 T) is a maximum magnetization in -7 T,  $B_{C+}$  is a positive coercivity,  $B_{C-}$  is negative coercivity,  $M_{R+}$  is a positive remanent magnetization, and  $M_{R-}$  is a negative remanent magnetization. (a) denotes the sample before reaction and (b) and (c) denote the samples after reaction with Cr(VI) solution (b – the sample after two reaction cycles without UV-C irradiation, c – the sample after nine reaction cycles under UV-C irradiation).

| Conditions/<br>Number of cycles                              | <i>T</i><br>(K) | $M_{\max+}$ (7 T)<br>(Am <sup>2</sup> /kg) | $M_{\max-}$ (-7 T)<br>(Am <sup>2</sup> /kg) | $B_{C+}$<br>(mT) | $B_{C-}$<br>(mT) | $M_{R+}$<br>(Am <sup>2</sup> /kg) | $M_{R-}$<br>(Am <sup>2</sup> /kg) |
|--------------------------------------------------------------|-----------------|--------------------------------------------|---------------------------------------------|------------------|------------------|-----------------------------------|-----------------------------------|
| (a) nZVI@TiO <sub>2</sub> 0                                  | 5               | 16.17                                      | -16.17                                      | 55.3             | -57.5            | 4.83                              | -4.89                             |
| (b) nZVI@TiO <sub>2</sub> nZVI<br>without UV-C irradiation/2 | 5               | 6.39                                       | -6.39                                       | 71.3             | -74.3            | 1.68                              | -1.64                             |
| (c) nZVI@TiO <sub>2</sub> nZVI<br>under UV-C irradiation/9   | 5               | 8.58                                       | -8.58                                       | 57.6             | -61.2            | 2.03                              | -2.01                             |
| (a) nZVI@TiO <sub>2</sub> 0                                  | 300             | 13.83                                      | -13.83                                      | 44.7             | -45.2            | 4.08                              | -4.06                             |
| (b) nZVI@TiO <sub>2</sub> nZVI<br>without UV-C irradiation/2 | 300             | 3.60                                       | -3.60                                       | 58.2             | -58.1            | 1.43                              | -1.44                             |
| (c) nZVI@TiO <sub>2</sub> nZVI<br>under UV-C irradiation/9   | 300             | 5.58                                       | -5.58                                       | 47.7             | -47.2            | 1.74                              | -1.73                             |

**Table S2.** Removal capacities of Cr(VI) with other adsorbents found in literature.

| Material                                             | Removal capacity (mg/g) | pH       | Ref.             |
|------------------------------------------------------|-------------------------|----------|------------------|
| Polyaniline Coated Ethyl Cellulose                   | 38.76                   | 1        | 1                |
| Polyethylenimine Facilitated Ethyl Cellulose         | 36.8                    | 3        | 2                |
| Polyaniline/Carbon Fibers                            | 18.1                    | 1        | 1                |
| Polyaniline/Ethyl Cellulose                          | 38.76                   |          |                  |
| Polyaniline/Fe <sub>3</sub> O <sub>4</sub>           | 6.0                     | 3        | 3                |
| Mesoporous Carbon-Fe <sub>3</sub> O <sub>4</sub> /Fe | 327.5/15.3              | 1 / 7    | 4                |
| Mesoporous Carbon-Fe <sub>3</sub> O <sub>4</sub> /Fe | 278.8/22.5              | 2 / 7    | 2                |
| ZVI/chitosan                                         | 55.8                    | 3        | 5                |
| γ-Fe <sub>2</sub> O <sub>3</sub> nanoparticles       | 19.2                    | 2.5      | 6                |
| δ-FeOOH-coated γ-Fe <sub>2</sub> O <sub>3</sub>      | 25.8                    | 2        | 7                |
| Carbon core/ZVI                                      | 0.63                    | NA       | 8                |
| Polyaniline/Carbon fiber                             | 18.1                    | 1        | 9                |
| TiO <sub>2</sub>                                     | 23.8                    | 3        | 10               |
| TiO <sub>2</sub> -Ag                                 | 25.7                    | 2        | 11               |
| nZVI-Fe <sub>3</sub> O <sub>4</sub>                  | 100-29.4                | 3-8      | 12               |
| TiO <sub>2</sub>                                     | 7.4                     | 4.5      | 13               |
| Carbon spheres/TiO <sub>2</sub>                      | 18.1                    | 2        | 14               |
| HCB/TiO <sub>2</sub>                                 | 27.33                   | 2        | 15               |
| <b>nZVI@TiO<sub>2</sub></b>                          | <b>51.6</b>             | <b>3</b> | <b>this work</b> |

## References

- (1) Qiu, B., Xu, C., Sun, D., Yi, H., Guo, J., Zhang, X., Qu, H., Guerrero, M., Wang, X., Noel, N., Luo, Z., Guo, Z., Wei, S., **2014**. Polyaniline Coated Ethyl Cellulose with Improved Hexavalent Chromium Removal. *ACS Sustain. Chem. Eng.* 2, 2070-2080.
- (2) Qiu, B., Guo, J., Zhang, X., Sun, D., Gu, H., Wang, Q., Wang, H., Wang, X., Zhang, X., Weeks, B. L., Guo, Z., Wei, S., **2014**. Polyethylenimine Facilitated Ethyl Cellulose for Hexavalent Chromium Removal with a Wide pH Range. *ACS Appl. Mater. Interfaces* 6, 19816-24.
- (3) Gu, H., Rapole, S. B., Sharma, J., Huang, Y., Cao, D., Colorado, H. A., Luo, Z., Haldolaarachchige, N., Young, D. P., Walters, B., Wei, S., Guo, Z., **2012**. Magnetic polyaniline nanocomposites toward toxic hexavalent chromium Removal. *RSC Adv.* 2, 11007-11018.
- (4) Qiu, B., Gu, H., Yan, X., Guo, J., Wang, Y., Sun, D., Wang, Q., Khan, M., Zhang, X., Weeks, B. L., Young, D. P., Guo, Z., Wei, S., **2014**. Cellulose derived magnetic mesoporous carbon nanocomposites with enhanced hexavalent chromium removal. *J. Mater. Chem. A.* 2, 17454-17462.

- (5) Thinh , N. N., Hanh , P. T. B., Ha, L. T. T., Anh, L. N., Hoang, T. V., Hoang , V. D., Dang, L. H., Khoi, N. V., Lam, T. D., **2013**. Magnetic chitosan nanoparticles for removal of Cr(VI) from aqueous solution. *Mater. Sci. Eng. C* 33, 1214–1218.
- (6) Hu, J., Chen, G., Lo, I. M.C., **2005**. Removal and recovery of Cr(VI) from wastewater by maghemite nanoparticles. *Water Res.* 39, 4528–4536.
- (7) Hu, J., Lo, I. M.C., Chen, G., **2007**. Performance and mechanism of chromate (VI) adsorption by  $\delta$ -FeOOH-coated maghemite ( $\gamma$ -Fe<sub>2</sub>O<sub>3</sub>) nanoparticles. *Sep. Purif. Technol.* 58,76–82.
- (8) Zhang, D., Wei, S., Kaila, C., Su, X., Wu, J., Karki, A. B., Young, D. P., Guo, Z., **2010**. Carbon-stabilized iron nanoparticles for environmental remediation. *Nanoscale* 2, 917–919.
- (9) Qiu, B., Xu, C., Sun, D., Wei, H., Zhang, X., Guo, J., Wang, Q., Rutman, D., Guo, Z., Wei, S., **2014**. Polyaniline coating on carbon fiber fabrics for improved hexavalent chromium removal. *RSC Adv.* 4, 29855-29865.
- (10) Malakootian, M., Mansuri, F., **2015**. Hexavalent chromium removal by titanium dioxide photocatalytic reduction and the effect of phenol and humic acid on its removal efficiency. *Int. J. Env. Health Eng.* 4, 19.
- (11) Liu, S. S., Chen, Y. Z., Zhang, L., Hua, G. M., Xu, W., Li, N., Zhang, Y., **2011**. Enhanced removal of trace Cr(VI) ions from aqueous solution by titanium oxide–Ag composite adsorbents. *J. Hazard. Mater.* 190, 723–728.
- (12) Lv, X., Xu, J., Jiang, G., Tang, J., Xu, X., **2012**. Highly active nanoscale zero-valent iron (nZVI)–Fe<sub>3</sub>O<sub>4</sub> nanocomposites for the removal of chromium(VI) from aqueous solutions. *J. Colloid Interface Sci.* 369, 460–469.
- (13) Hung, D. D., Kim, Y. J., Nguyen, T. M., Yoon, H. O., Oh, S. G., Jo, H. Y., Lee, Y. J., **2015**. Characterization of Cr Sorption and Reduction on TiO<sub>2</sub>: Batch and XPS Studies. *Water Air Soil Pollut.* 226, 2252.
- (14) Qian, H., Hu, Y., Liu, Y., Zhou, M., Guo, C., **2012**. Electrostatic self-assembly of TiO<sub>2</sub> nanoparticles onto carbon spheres with enhanced adsorption capability for Cr(VI). *Mater. Lett.* 68, 174–177.
- (15) Zhang, L., Zhang, Y., **2014**. Adsorption characteristics of hexavalent chromium on HCB/TiO<sub>2</sub>. *Appl. Surf. Sci.* 316, 649–656.
